# Supplementary material for: Screening of by-products from the food industry as growth promoting agents in serum-free media for skeletal muscle cell culture
Source: Royal Society of Chemistry journal article supplement (doi:10.1039/c9fo02690h), 2020-01-01
Supplement: c9fo02690h1.pdf [file c9fo02690h1.pdf]

## Supporting Information

### Screening of by-products from the food industry as growth promoting agents in serum-free media for skeletal muscle cell culture

R. Christel Andreassen,<sup>ab</sup> Mona E. Pedersen,<sup>a</sup> Kenneth A. Kristoffersen,<sup>a</sup> Sissel B. Rønning<sup>a\*</sup>

*a) Nofima - Norwegian Institute of Food, Fisheries and Aquaculture Research, P.O. Box 210, N-1431 Ås, Norway. b) Institute of basic medical sciences, Faculty of medicine, Norwegian University of Oslo, sognsvannsveien 9, 0372 Oslo, Norway.*

*\* Corresponding author: Sissel Beate Rønning, [sissel.ronning@nofima.no](mailto:sissel.ronning@nofima.no)*

This document contains:

One figure containing all size exclusion chromatograms (SEC). 13 tables; the first contains  $M_w$  and molecular weight distribution (MWD) values, the second table contains retention times for all standards used to calculate  $M_w$ , The remaining tables contains statistical data from one-way ANOVA using Dunnett's multiple comparison test for all treatments.

**A**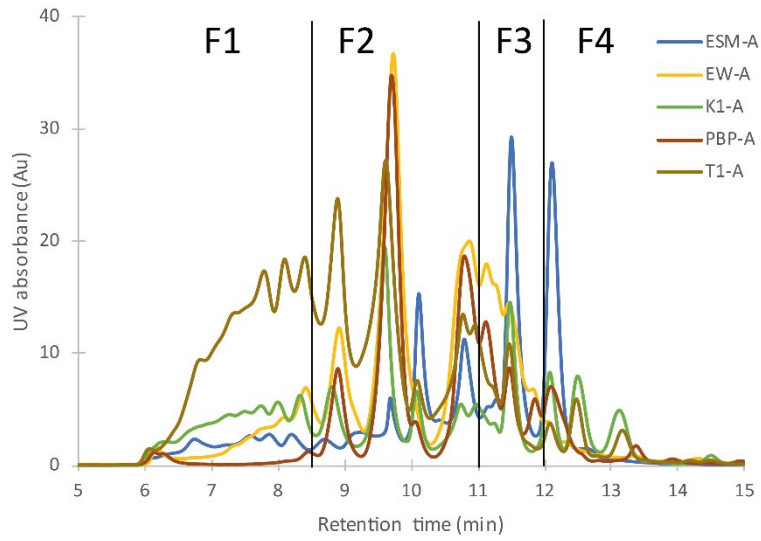**B**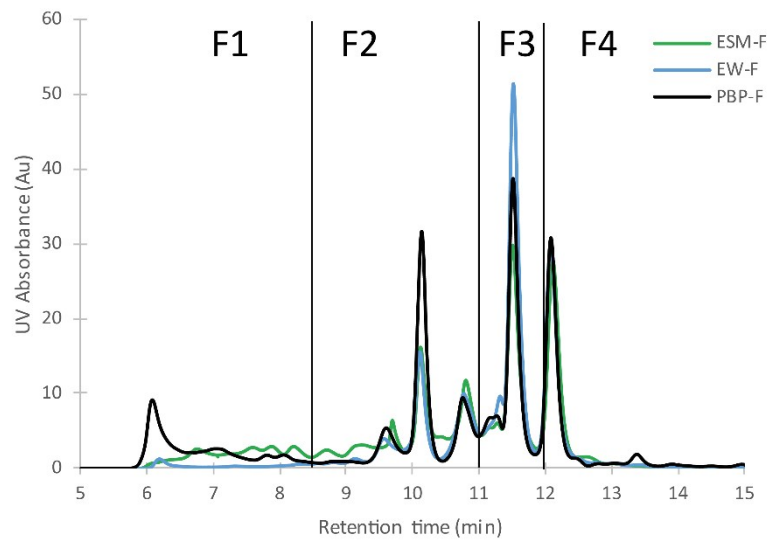**C**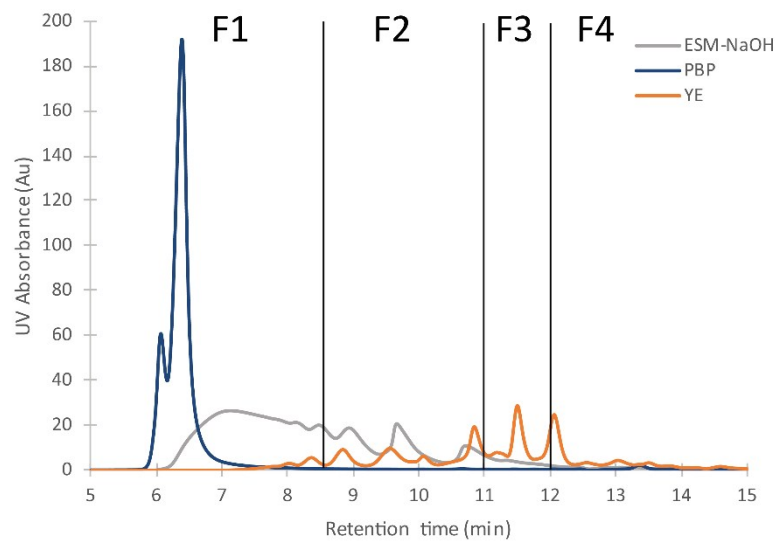

**Fig S-1:** All SEC chromatograms from 5-15 min of the 11 different materials studied. A: Eggshell membrane (ESM), egg whites (EW), cod (T1), Chicken (K1), and pork blood plasma (PBP) hydrolyzed with Alcalase (A). B: ESM, EW, and PBP hydrolyzed with Flavourzyme (F). C: ESM chemically hydrolyzed with NaOH, and lyophilized PBP and yeast extract (YE) powder.

**Table S-1:**  $M_w$  (g/mol) and molecular weight distribution (MWD) values for all samples.

| Sample   | $M_w$   | Area  | F1 (%) | F2 (%) | F3 (%) | F4 (%) |
|----------|---------|-------|--------|--------|--------|--------|
| ESM-A    | 1137,6  | 46,37 | 7,1    | 14,3   | 68,1   | 10,5   |
| ESM-F    | 1054,6  | 31,31 | 7,9    | 9,8    | 62,0   | 20,3   |
| ESM-NaOH | 4128,0  | 82,82 | 50,9   | 21,7   | 22,6   | 4,9    |
| EW-A     | 1222,2  | 46,43 | 8,0    | 14,7   | 71,0   | 6,3    |
| EW-F     | 707,8   | 28,91 | 2,4    | 2,8    | 69,7   | 25,1   |
| K1-A     | 2467,6  | 31,59 | 25,7   | 13,6   | 41,5   | 19,2   |
| PBP      | 16831,0 | 61,45 | 95,0   | 0,9    | 1,3    | 2,9    |
| PBP-A    | 1005,3  | 30,54 | 2,1    | 8,9    | 75,7   | 13,3   |
| PBP-F    | 2923,8  | 34,79 | 17,3   | 2,7    | 56,6   | 23,5   |
| T1-A     | 2791,6  | 66,07 | 33,5   | 24,9   | 36,0   | 5,6    |
| YE       | 723,7   | 38,35 | 4,4    | 12,7   | 51,2   | 31,7   |

All samples were measured once

**Table S-2:** The molecular weights (Mw) and the retention times (RT) for the analytical standards used for the BioSep-SEC-s2000 column calibration.

| <b>Compound name</b>                          | <b>Mw<br/>(g/mol)</b> | <b>RT<br/>(min)</b> |
|-----------------------------------------------|-----------------------|---------------------|
| Albumin from chicken egg white                | 44287                 | 6.071               |
| Carbonic anhydrase                            | 29000                 | 6.003               |
| Lysozyme                                      | 14300                 | 6.626               |
| Aprotinin from bovine lung                    | 6511                  | 6.865               |
| Insulin chain B oxidized from bovine pancreas | 3496                  | 8.763               |
| Renin substrate tetradecapeptide porcine      | 1759                  | 8.133               |
| Angiotensin II human                          | 1046                  | 8.724               |
| Bradykinin Fragment 1-7                       | 757                   | 9.208               |
| [D-Ala <sup>2</sup> ]-leucine enkephalin      | 570                   | 11.377              |
| Val-Tyr-Val                                   | 379                   | 10.925              |
| Tryptophan                                    | 204                   | 11.950              |

The column was calibrated using the mean of three replicates of each standers.

**Table S-3 to S-13:** Statistics of all treatments, significant variance by treatments in comparison to the control sample (cells grown in normal serum conditions), analysed by one-way ANOVA using Dunnett's multiple comparison test of all samples. Asterix indicate significant differences, \* $<0.05$ , \*\* $<0.001$ , \*\*\*  $<0.001$ , \*\*\*\* $p<0.0001$ . Abbreviations: ESM (eggshell membrane), ns (no significant difference).

**TABLE S-3: COD ALCALASE**

|            |                          | DUNNETT'S MULTIPLE COMPARISONS TEST | MEAN DIFF | 95,00% CI OF DIFF | SIGNIFICANT? | SUMMARY | ADJUSTED P VALUE |
|------------|--------------------------|-------------------------------------|-----------|-------------------|--------------|---------|------------------|
| <b>ATP</b> | Normal serum conditions  | Control vs. 0.1                     | -2,645    | -20,13 to 14,84   | No           | ns      | 0,9976           |
|            |                          | Control vs. 1                       | -18,97    | -36,45 to -1,487  | Yes          | *       | 0,0277           |
|            |                          | Control vs. 10                      | -7,463    | -24,94 to 10,02   | No           | ns      | 0,7490           |
|            |                          | Control vs. 100                     | -8,533    | -26,01 to 8,949   | No           | ns      | 0,6345           |
|            |                          | Control vs. 1000                    | -2,939    | -20,42 to 14,54   | No           | ns      | 0,9954           |
|            |                          | Control vs. 10000                   | 42,08     | 24,6 to 59,56     | Yes          | ****    | <0,0001          |
|            | Reduced-serum conditions | Control vs. 0.1                     | 17,86     | 2,416 to 33,3     | Yes          | *       | 0,0163           |
|            |                          | Control vs. 1                       | 20,94     | 5,499 to 36,39    | Yes          | **      | 0,0032           |
|            |                          | Control vs. 10                      | 4,649     | -10,79 to 20,09   | No           | ns      | 0,9302           |
|            |                          | Control vs. 100                     | 20,59     | 5,145 to 36,03    | Yes          | **      | 0,0039           |
|            |                          | Control vs. 1000                    | 6,31      | -9,135 to 21,75   | No           | ns      | 0,7813           |
|            |                          | Control vs. 10000                   | 44,59     | 29,14 to 60,03    | Yes          | ****    | <0,0001          |
|            | Serum-free conditions    | Control vs. 0.1                     | 56,81     | 45,02 to 68,6     | Yes          | ****    | <0,0001          |
|            |                          | Control vs. 1                       | 50,2      | 38,41 to 61,99    | Yes          | ****    | <0,0001          |
|            |                          | Control vs. 10                      | 54,36     | 42,57 to 66,15    | Yes          | ****    | <0,0001          |
|            |                          | Control vs. 100                     | 53,49     | 41,7 to 65,28     | Yes          | ****    | <0,0001          |
|            |                          | Control vs. 1000                    | 37,05     | 25,26 to 48,84    | Yes          | ****    | <0,0001          |
|            |                          | Control vs. 10000                   | 71,03     | 59,24 to 82,82    | Yes          | ****    | <0,0001          |
| <b>DNA</b> | Normal serum conditions  | Control vs. 0.1                     | 0,3265    | -15,92 to 16,58   | No           | ns      | >0,9999          |
|            |                          | Control vs. 1                       | -11,9     | -28,15 to 4,345   | No           | ns      | 0,2360           |
|            |                          | Control vs. 10                      | -16,02    | -32,27 to 0,2337  | No           | ns      | 0,0549           |
|            |                          | Control vs. 100                     | -11,73    | -27,98 to 4,52    | No           | ns      | 0,2488           |
|            |                          | Control vs. 1000                    | -1,146    | -17,4 to 15,1     | No           | ns      | 0,9997           |
|            |                          | Control vs. 10000                   | 10,11     | -9,394 to 29,62   | No           | ns      | 0,5747           |
|            | Reduced-serum conditions | Control vs. 0.1                     | 3,038     | -17,92 to 24      | No           | ns      | 0,9978           |
|            |                          | Control vs. 1                       | 3,069     | -17,89 to 24,03   | No           | ns      | 0,9977           |
|            |                          | Control vs. 10                      | 2,575     | -18,39 to 23,53   | No           | ns      | 0,9995           |
|            |                          | Control vs. 100                     | 2,381     | -18,58 to 23,34   | No           | ns      | 0,9996           |
|            |                          | Control vs. 1000                    | -2,402    | -23,36 to 18,56   | No           | ns      | 0,9996           |
|            |                          | Control vs. 10000                   | 12,9      | -8,062 to 33,86   | No           | ns      | 0,4013           |
|            | Serum-free conditions    | Control vs. 0.1                     | 44,61     | 23,15 to 66,08    | Yes          | ****    | <0,0001          |
|            |                          | Control vs. 1                       | 45,5      | 24,03 to 66,96    | Yes          | ****    | <0,0001          |
|            |                          | Control vs. 10                      | 45,32     | 23,86 to 66,78    | Yes          | ****    | <0,0001          |
|            |                          | Control vs. 100                     | 41,53     | 20,07 to 63       | Yes          | ****    | <0,0001          |
|            |                          | Control vs. 1000                    | 23,49     | 2,026 to 44,95    | Yes          | *       | 0,0260           |
|            |                          | Control vs. 10000                   | -4,988    | -26,45 to 16,48   | No           | ns      | 0,9782           |
| <b>LDH</b> | Normal serum conditions  | Control vs. 0.1                     | 6,264     | -3,668 to 16,2    | No           | ns      | 0,3784           |
|            |                          | Control vs. 1                       | 6,511     | -3,421 to 16,44   | No           | ns      | 0,3400           |
|            |                          | Control vs. 10                      | 7,828     | -2,104 to 17,76   | No           | ns      | 0,1785           |
|            |                          | Control vs. 100                     | 7,105     | -2,827 to 17,04   | No           | ns      | 0,2581           |
|            |                          | Control vs. 1000                    | 8,281     | -1,651 to 18,21   | No           | ns      | 0,1391           |
|            |                          | Control vs. 10000                   | -28,29    | -38,22 to -18,36  | Yes          | ****    | <0,0001          |
|            | Reduced-serum conditions | Control vs. 0.1                     | 20,09     | 11,93 to 28,26    | Yes          | ****    | <0,0001          |
|            |                          | Control vs. 1                       | 24,58     | 16,41 to 32,75    | Yes          | ****    | <0,0001          |
|            |                          | Control vs. 10                      | 25,41     | 17,24 to 33,57    | Yes          | ****    | <0,0001          |
|            |                          | Control vs. 100                     | 23,02     | 14,86 to 31,19    | Yes          | ****    | <0,0001          |
|            |                          | Control vs. 1000                    | 20,5      | 12,34 to 28,67    | Yes          | ****    | <0,0001          |
|            |                          | Control vs. 10000                   | -18,21    | -26,37 to -10,04  | Yes          | ****    | <0,0001          |
|            | Serum-free conditions    | Control vs. 0.1                     | 32,74     | 25,23 to 40,24    | Yes          | ****    | <0,0001          |
|            |                          | Control vs. 1                       | 33,8      | 26,3 to 41,31     | Yes          | ****    | <0,0001          |
|            |                          | Control vs. 10                      | 36,67     | 29,16 to 44,17    | Yes          | ****    | <0,0001          |
|            |                          | Control vs. 100                     | 32,19     | 24,68 to 39,7     | Yes          | ****    | <0,0001          |
|            |                          | Control vs. 1000                    | 27,71     | 20,2 to 35,21     | Yes          | ****    | <0,0001          |
|            |                          | Control vs. 10000                   | -23,65    | -31,16 to -16,15  | Yes          | ****    | <0,0001          |

**TABLE S-4: CHICKEN ALCALASE**

|            |                          | <b>DUNNETT'S MULTIPLE<br/>COMPARISONS TEST</b> | <b>MEAN DIFF</b> | <b>95,00% CI OF DIFF</b> | <b>SIGNIFICANT?</b> | <b>SUMMARY</b> | <b>ADJUSTED P<br/>VALUE</b> |
|------------|--------------------------|------------------------------------------------|------------------|--------------------------|---------------------|----------------|-----------------------------|
| <b>ATP</b> | Normal serum conditions  | Control vs. 0.1                                | 1,667            | -17,61 to 20,95          | No                  | ns             | 0,9997                      |
|            |                          | Control vs. 1                                  | -16,55           | -35,83 to 2,726          | No                  | ns             | 0,1207                      |
|            |                          | Control vs. 10                                 | -17,46           | -36,74 to 1,817          | No                  | ns             | 0,0912                      |
|            |                          | Control vs. 100                                | -18,88           | -38,15 to 0,4023         | No                  | ns             | 0,0574                      |
|            |                          | Control vs. 1000                               | -14,24           | -33,52 to 5,035          | No                  | ns             | 0,2298                      |
|            |                          | Control vs. 10000                              | 87,81            | 68,54 to 107,1           | Yes                 | ****           | <0,0001                     |
|            | Reduced-serum conditions | Control vs. 0.1                                | 9,842            | -4,122 to 23,81          | No                  | ns             | 0,2712                      |
|            |                          | Control vs. 1                                  | 7,941            | -6,023 to 21,9           | No                  | ns             | 0,4834                      |
|            |                          | Control vs. 10                                 | 2,574            | -11,39 to 16,54          | No                  | ns             | 0,9933                      |
|            |                          | Control vs. 100                                | -4,269           | -18,23 to 9,695          | No                  | ns             | 0,9256                      |
|            |                          | Control vs. 1000                               | 6,632            | -7,332 to 20,6           | No                  | ns             | 0,6596                      |
|            |                          | Control vs. 10000                              | 84,43            | 70,47 to 98,39           | Yes                 | ****           | <0,0001                     |
|            | Serum-free conditions    | Control vs. 0.1                                | 54,19            | 40,40 to 67,99           | Yes                 | ****           | <0,0001                     |
|            |                          | Control vs. 1                                  | 48,62            | 34,83 to 62,42           | Yes                 | ****           | <0,0001                     |
|            |                          | Control vs. 10                                 | 45,93            | 32,13 to 59,73           | Yes                 | ****           | <0,0001                     |
|            |                          | Control vs. 100                                | 42,98            | 29,19 to 56,78           | Yes                 | ****           | <0,0001                     |
|            |                          | Control vs. 1000                               | 38,44            | 24,64 to 52,23           | Yes                 | ****           | <0,0001                     |
|            |                          | Control vs. 10000                              | 62,05            | 48,25 to 75,85           | Yes                 | ****           | <0,0001                     |
| <b>DNA</b> | Normal serum conditions  | Control vs. 0.1                                | 9,18             | -8,264 to 26,62          | No                  | ns             | 0,5599                      |
|            |                          | Control vs. 1                                  | 2,856            | -14,59 to 20,3           | No                  | ns             | 0,9957                      |
|            |                          | Control vs. 10                                 | -3,168           | -20,61 to 14,28          | No                  | ns             | 0,9937                      |
|            |                          | Control vs. 100                                | -13,86           | -31,3 to 3,584           | No                  | ns             | 0,1717                      |
|            |                          | Control vs. 1000                               | -9,402           | -26,85 to 8,042          | No                  | ns             | 0,5360                      |
|            |                          | Control vs. 10000                              | 39,83            | 20,31 to 59,34           | Yes                 | ****           | <0,0001                     |
|            | Reduced-serum conditions | Control vs. 0.1                                | 28,78            | 12,27 to 45,3            | Yes                 | ****           | <0,0001                     |
|            |                          | Control vs. 1                                  | 19,79            | 3,277 to 36,31           | Yes                 | *              | 0,0119                      |
|            |                          | Control vs. 10                                 | 11,37            | -5,142 to 27,89          | No                  | ns             | 0,2913                      |
|            |                          | Control vs. 100                                | 4,035            | -12,48 to 20,55          | No                  | ns             | 0,9723                      |
|            |                          | Control vs. 1000                               | 11,08            | -5,439 to 27,59          | No                  | ns             | 0,3164                      |
|            |                          | Control vs. 10000                              | 35,72            | 19,2 to 52,23            | Yes                 | ****           | <0,0001                     |
|            | Serum-free conditions    | Control vs. 0.1                                | 55,51            | 40,69 to 70,34           | Yes                 | ****           | <0,0001                     |
|            |                          | Control vs. 1                                  | 56,96            | 42,13 to 71,78           | Yes                 | ****           | <0,0001                     |
|            |                          | Control vs. 10                                 | 51,82            | 36,99 to 66,64           | Yes                 | ****           | <0,0001                     |
|            |                          | Control vs. 100                                | 48,34            | 33,52 to 63,17           | Yes                 | ****           | <0,0001                     |
|            |                          | Control vs. 1000                               | 40,39            | 25,57 to 55,22           | Yes                 | ****           | <0,0001                     |
|            |                          | Control vs. 10000                              | 43,36            | 28,54 to 58,19           | Yes                 | ****           | <0,0001                     |
| <b>LDH</b> | Normal serum conditions  | Control vs. 0.1                                | 2,515            | -7,035 to 12,06          | No                  | ns             | 0,9614                      |
|            |                          | Control vs. 1                                  | 6,583            | -2,967 to 16,13          | No                  | ns             | 0,2920                      |
|            |                          | Control vs. 10                                 | 4,849            | -4,701 to 14,4           | No                  | ns             | 0,5976                      |
|            |                          | Control vs. 100                                | 7,671            | -1,879 to 17,22          | No                  | ns             | 0,1646                      |
|            |                          | Control vs. 1000                               | 1,98             | -7,57 to 11,53           | No                  | ns             | 0,9882                      |
|            |                          | Control vs. 10000                              | -63,09           | -72,64 to -53,54         | Yes                 | ****           | <0,0001                     |
|            | Reduced-serum conditions | Control vs. 0.1                                | 16,45            | 7,239 to 25,66           | Yes                 | ****           | <0,0001                     |
|            |                          | Control vs. 1                                  | 16,68            | 7,471 to 25,89           | Yes                 | ****           | <0,0001                     |
|            |                          | Control vs. 10                                 | 18,66            | 9,444 to 27,87           | Yes                 | ****           | <0,0001                     |
|            |                          | Control vs. 100                                | 20,91            | 11,7 to 30,12            | Yes                 | ****           | <0,0001                     |
|            |                          | Control vs. 1000                               | 13,47            | 4,261 to 22,68           | Yes                 | **             | 0,0012                      |
|            |                          | Control vs. 10000                              | -44,79           | -54 to -35,57            | Yes                 | ****           | <0,0001                     |
|            | Serum-free conditions    | Control vs. 0.1                                | 31,43            | 20,27 to 42,6            | Yes                 | ****           | <0,0001                     |
|            |                          | Control vs. 1                                  | 30,27            | 19,1 to 41,43            | Yes                 | ****           | <0,0001                     |
|            |                          | Control vs. 10                                 | 30,14            | 18,97 to 41,3            | Yes                 | ****           | <0,0001                     |
|            |                          | Control vs. 100                                | 29,75            | 18,58 to 40,91           | Yes                 | ****           | <0,0001                     |
|            |                          | Control vs. 1000                               | 23,99            | 12,83 to 35,16           | Yes                 | ****           | <0,0001                     |
|            |                          | Control vs. 10000                              | -42,3            | -53,46 to -31,13         | Yes                 | ****           | <0,0001                     |

TABLE S-5: EGGHELL MEMBRANE ALCALASE

|            |                          | DUNNETT'S MULTIPLE COMPARISONS TEST | MEAN DIFF | 95,00% CI OF DIFF | SIGNIFICANT? | SUMMARY | ADJUSTED P VALUE |
|------------|--------------------------|-------------------------------------|-----------|-------------------|--------------|---------|------------------|
| <b>ATP</b> | Normal serum conditions  | Control vs. 0.1                     | -2,811    | -13,73 to 8,109   | No           | ns      | 0,9648           |
|            |                          | Control vs. 1                       | -13,04    | -23,96 to -2,116  | Yes          | *       | 0,0123           |
|            |                          | Control vs. 10                      | -10,8     | -21,72 to 0,1177  | No           | ns      | 0,0536           |
|            |                          | Control vs. 100                     | -12,54    | -23,46 to -1,616  | Yes          | *       | 0,0175           |
|            |                          | Control vs. 1000                    | -4,719    | -15,64 to 6,2     | No           | ns      | 0,7380           |
|            |                          | Control vs. 10000                   | 45,32     | 34,4 to 56,24     | Yes          | ****    | <0,0001          |
|            | Reduced-serum conditions | Control vs. 0.1                     | 11,97     | 1,332 to 22,61    | Yes          | *       | 0,0208           |
|            |                          | Control vs. 1                       | 14,8      | 4,161 to 25,44    | Yes          | **      | 0,0024           |
|            |                          | Control vs. 10                      | 9,328     | -1,31 to 19,97    | No           | ns      | 0,1082           |
|            |                          | Control vs. 100                     | 12,69     | 2,055 to 23,33    | Yes          | *       | 0,0124           |
|            |                          | Control vs. 1000                    | 19,53     | 8,89 to 30,17     | Yes          | ****    | <0,0001          |
|            |                          | Control vs. 10000                   | 50,31     | 39,67 to 60,94    | Yes          | ****    | <0,0001          |
|            | Serum-free conditions    | Control vs. 0.1                     | 54,48     | 43,64 to 65,32    | Yes          | ****    | <0,0001          |
|            |                          | Control vs. 1                       | 54,3      | 43,46 to 65,14    | Yes          | ****    | <0,0001          |
|            |                          | Control vs. 10                      | 53,15     | 42,31 to 63,99    | Yes          | ****    | <0,0001          |
|            |                          | Control vs. 100                     | 54,14     | 43,3 to 64,98     | Yes          | ****    | <0,0001          |
|            |                          | Control vs. 1000                    | 55,06     | 44,22 to 65,9     | Yes          | ****    | <0,0001          |
|            |                          | Control vs. 10000                   | 78,22     | 67,38 to 89,06    | Yes          | ****    | <0,0001          |
| <b>DNA</b> | Normal serum conditions  | Control vs. 0.1                     | -10,16    | -28,77 to 8,451   | No           | ns      | 0,5234           |
|            |                          | Control vs. 1                       | -11,44    | -30,05 to 7,172   | No           | ns      | 0,4026           |
|            |                          | Control vs. 10                      | -15,2     | -33,81 to 3,412   | No           | ns      | 0,1523           |
|            |                          | Control vs. 100                     | -25,04    | -43,65 to -6,431  | Yes          | **      | 0,0036           |
|            |                          | Control vs. 1000                    | -14,14    | -32,75 to 4,465   | No           | ns      | 0,2057           |
|            |                          | Control vs. 10000                   | 14,37     | -4,237 to 32,98   | No           | ns      | 0,1931           |
|            | Reduced-serum conditions | Control vs. 0.1                     | -27,99    | -63,86 to 7,885   | No           | ns      | 0,1860           |
|            |                          | Control vs. 1                       | -30,12    | -65,99 to 5,755   | No           | ns      | 0,1345           |
|            |                          | Control vs. 10                      | -37,01    | -72,88 to -1,139  | Yes          | *       | 0,0403           |
|            |                          | Control vs. 100                     | -37,57    | -73,44 to -1,696  | Yes          | *       | 0,0362           |
|            |                          | Control vs. 1000                    | -25,43    | -61,3 to 10,44    | No           | ns      | 0,2659           |
|            |                          | Control vs. 10000                   | -4,314    | -40,19 to 31,56   | No           | ns      | 0,9995           |
|            | Serum-free conditions    | Control vs. 0.1                     | 25,38     | 10,08 to 40,67    | Yes          | ***     | 0,0002           |
|            |                          | Control vs. 1                       | 27,68     | 10,99 to 44,37    | Yes          | ***     | 0,0002           |
|            |                          | Control vs. 10                      | 22,88     | 8,138 to 37,61    | Yes          | ***     | 0,0006           |
|            |                          | Control vs. 100                     | 26,9      | 10,96 to 42,84    | Yes          | ***     | 0,0001           |
|            |                          | Control vs. 1000                    | 25,87     | 9,928 to 41,81    | Yes          | ***     | 0,0003           |
|            |                          | Control vs. 10000                   | 27,7      | 11,01 to 44,39    | Yes          | ***     | 0,0002           |
| <b>LDH</b> | Normal serum conditions  | Control vs. 0.1                     | 6,508     | -14,91 to 27,92   | No           | ns      | 0,9270           |
|            |                          | Control vs. 1                       | 1,606     | -19,81 to 23,02   | No           | ns      | 0,9997           |
|            |                          | Control vs. 10                      | 15,05     | -6,369 to 36,46   | No           | ns      | 0,2735           |
|            |                          | Control vs. 100                     | 6,32      | -15,09 to 27,73   | No           | ns      | 0,9355           |
|            |                          | Control vs. 1000                    | 18,88     | -2,533 to 40,3    | No           | ns      | 0,1053           |
|            |                          | Control vs. 10000                   | -4,228    | -26,64 to 17,19   | No           | ns      | 0,9955           |
|            | Reduced-serum conditions | Control vs. 0.1                     | 12,73     | -13,71 to 39,17   | No           | ns      | 0,6462           |
|            |                          | Control vs. 1                       | 15,85     | -10,59 to 42,3    | No           | ns      | 0,4285           |
|            |                          | Control vs. 10                      | 5,663     | -20,78 to 32,11   | No           | ns      | 0,9856           |
|            |                          | Control vs. 100                     | -0,9636   | -27,41 to 25,48   | No           | ns      | 0,9999           |
|            |                          | Control vs. 1000                    | 4,37      | -22,07 to 30,81   | No           | ns      | 0,9956           |
|            |                          | Control vs. 10000                   | -12,12    | -38,56 to 14,32   | No           | ns      | 0,6900           |
|            | Serum-free conditions    | Control vs. 0.1                     | 35,3      | 20,06 to 50,53    | Yes          | ****    | <0,0001          |
|            |                          | Control vs. 1                       | 32,36     | 17,13 to 47,59    | Yes          | ****    | <0,0001          |
|            |                          | Control vs. 10                      | 32,71     | 17,48 to 47,94    | Yes          | ****    | <0,0001          |
|            |                          | Control vs. 100                     | 26,18     | 10,95 to 41,41    | Yes          | ***     | 0,0001           |
|            |                          | Control vs. 1000                    | 32,21     | 16,98 to 47,44    | Yes          | ****    | <0,0001          |
|            |                          | Control vs. 10000                   | 10,71     | -4,525 to 25,94   | No           | ns      | 0,2731           |

TABLE S-6: EGGHELL MEMBRANE FLAVOURZYME

|            |                          | DUNNETT'S MULTIPLE<br>COMPARISONS TEST | MEAN DIFF | 95,00% CI OF DIFF | SIGNIFICANT? | SUMMARY | ADJUSTED P<br>VALUE |
|------------|--------------------------|----------------------------------------|-----------|-------------------|--------------|---------|---------------------|
| <b>ATP</b> | Normal serum conditions  | Control vs. 0.1                        | -14,38    | -27,09 to -1,673  | Yes          | *       | 0,0198              |
|            |                          | Control vs. 1                          | -27,55    | -40,26 to -14,84  | Yes          | ****    | <0,0001             |
|            |                          | Control vs. 10                         | -29,36    | -42,07 to -16,65  | Yes          | ****    | <0,0001             |
|            |                          | Control vs. 100                        | -14,77    | -27,48 to -2,057  | Yes          | *       | 0,0158              |
|            |                          | Control vs. 1000                       | -11,73    | -24,44 to 0,9848  | No           | ns      | 0,0822              |
|            |                          | Control vs. 10000                      | 56,3      | 43,59 to 69,01    | Yes          | ****    | <0,0001             |
|            | Reduced-serum conditions | Control vs. 0.1                        | 4,429     | -6,472 to 15,33   | No           | ns      | 0,7838              |
|            |                          | Control vs. 1                          | 5,317     | -5,585 to 16,22   | No           | ns      | 0,6336              |
|            |                          | Control vs. 10                         | -2,331    | -13,23 to 8,57    | No           | ns      | 0,9856              |
|            |                          | Control vs. 100                        | -1,189    | -12,09 to 9,712   | No           | ns      | 0,9996              |
|            |                          | Control vs. 1000                       | 5,307     | -5,594 to 16,21   | No           | ns      | 0,6352              |
|            |                          | Control vs. 10000                      | 64,85     | 53,95 to 75,75    | Yes          | ****    | <0,0001             |
|            | Serum-free conditions    | Control vs. 0.1                        | 51,54     | 40,54 to 62,53    | Yes          | ****    | <0,0001             |
|            |                          | Control vs. 1                          | 52,27     | 41,27 to 63,26    | Yes          | ****    | <0,0001             |
|            |                          | Control vs. 10                         | 49,2      | 38,2 to 60,19     | Yes          | ****    | <0,0001             |
|            |                          | Control vs. 100                        | 47,84     | 36,84 to 58,83    | Yes          | ****    | <0,0001             |
|            |                          | Control vs. 1000                       | 48,4      | 37,41 to 59,4     | Yes          | ****    | <0,0001             |
|            |                          | Control vs. 10000                      | 79        | 68 to 89,99       | Yes          | ****    | <0,0001             |
| <b>DNA</b> | Normal serum conditions  | Control vs. 0.1                        | 0,4341    | -16,82 to 17,69   | No           | ns      | >0,9999             |
|            |                          | Control vs. 1                          | -5,571    | -22,82 to 11,68   | No           | ns      | 0,943               |
|            |                          | Control vs. 10                         | -12,87    | -30,13 to 4,378   | No           | ns      | 0,251               |
|            |                          | Control vs. 100                        | -16,49    | -33,74 to 0,7638  | No           | ns      | 0,0686              |
|            |                          | Control vs. 1000                       | -1,273    | -18,53 to 15,98   | No           | ns      | 0,9998              |
|            |                          | Control vs. 10000                      | 15,3      | -1,949 to 32,56   | No           | ns      | 0,1088              |
|            | Reduced-serum conditions | Control vs. 0.1                        | 14,35     | -0,795 to 29,49   | No           | ns      | 0,0704              |
|            |                          | Control vs. 1                          | 9,56      | -5,583 to 24,7    | No           | ns      | 0,3770              |
|            |                          | Control vs. 10                         | 6,579     | -8,564 to 21,72   | No           | ns      | 0,7353              |
|            |                          | Control vs. 100                        | 7,036     | -8,107 to 22,18   | No           | ns      | 0,6792              |
|            |                          | Control vs. 1000                       | 12,64     | -2,506 to 27,78   | No           | ns      | 0,1384              |
|            |                          | Control vs. 10000                      | 14,52     | -0,6225 to 29,66  | No           | ns      | 0,0655              |
|            | Serum-free conditions    | Control vs. 0.1                        | 45,91     | 30,18 to 61,65    | Yes          | ****    | <0,0001             |
|            |                          | Control vs. 1                          | 47,03     | 31,3 to 62,76     | Yes          | ****    | <0,0001             |
|            |                          | Control vs. 10                         | 42,09     | 26,36 to 57,82    | Yes          | ****    | <0,0001             |
|            |                          | Control vs. 100                        | 38,76     | 23,03 to 54,49    | Yes          | ****    | <0,0001             |
|            |                          | Control vs. 1000                       | 41,22     | 25,49 to 56,95    | Yes          | ****    | <0,0001             |
|            |                          | Control vs. 10000                      | 47,66     | 30,65 to 64,68    | Yes          | ****    | <0,0001             |
| <b>LDH</b> | Normal serum conditions  | Control vs. 0.1                        | -1,458    | -10,07 to 7,157   | No           | ns      | 0,9952              |
|            |                          | Control vs. 1                          | -2,553    | -11,17 to 6,062   | No           | ns      | 0,9343              |
|            |                          | Control vs. 10                         | -2,638    | -11,25 to 5,977   | No           | ns      | 0,9247              |
|            |                          | Control vs. 100                        | -3,468    | -12,08 to 5,147   | No           | ns      | 0,7908              |
|            |                          | Control vs. 1000                       | -6,843    | -15,46 to 1,772   | No           | ns      | 0,1723              |
|            |                          | Control vs. 10000                      | -28,95    | -37,56 to -20,33  | Yes          | ****    | <0,0001             |
|            | Reduced-serum conditions | Control vs. 0.1                        | 15,73     | 9,326 to 22,14    | Yes          | ****    | <0,0001             |
|            |                          | Control vs. 1                          | 17,31     | 10,9 to 23,71     | Yes          | ****    | <0,0001             |
|            |                          | Control vs. 10                         | 16,89     | 10,49 to 23,3     | Yes          | ****    | <0,0001             |
|            |                          | Control vs. 100                        | 15,68     | 9,277 to 22,09    | Yes          | ****    | <0,0001             |
|            |                          | Control vs. 1000                       | 13,07     | 6,664 to 19,48    | Yes          | ****    | <0,0001             |
|            |                          | Control vs. 10000                      | -15,18    | -21,58 to -8,774  | Yes          | ****    | <0,0001             |
|            | Serum-free conditions    | Control vs. 0.1                        | 30,09     | 23,48 to 36,7     | Yes          | ****    | <0,0001             |
|            |                          | Control vs. 1                          | 32,38     | 25,77 to 38,98    | Yes          | ****    | <0,0001             |
|            |                          | Control vs. 10                         | 30,2      | 23,59 to 36,81    | Yes          | ****    | <0,0001             |
|            |                          | Control vs. 100                        | 28,47     | 21,87 to 35,08    | Yes          | ****    | <0,0001             |
|            |                          | Control vs. 1000                       | 25,86     | 19,25 to 32,47    | Yes          | ****    | <0,0001             |
|            |                          | Control vs. 10000                      | -5,418    | -12,03 to 1,19    | No           | ns      | 0,1500              |



TABLE S-7: EGGHELL MEMBRANE NAOH

|            |                          | DUNNETT'S MULTIPLE<br>COMPARISONS TEST | MEAN DIFF | 95,00% CI OF DIFF | SIGNIFICANT? | SUMMARY | ADJUSTED P<br>VALUE |
|------------|--------------------------|----------------------------------------|-----------|-------------------|--------------|---------|---------------------|
| <b>ATP</b> | Normal serum conditions  | Control vs. 0.1                        | -3,654    | -14,38 to 7,068   | No           | ns      | 0,8841              |
|            |                          | Control vs. 1                          | -4,377    | -16,52 to 7,77    | No           | ns      | 0,8572              |
|            |                          | Control vs. 10                         | -4,83     | -16,98 to 7,317   | No           | ns      | 0,7988              |
|            |                          | Control vs. 100                        | -4,947    | -17,09 to 7,2     | No           | ns      | 0,7823              |
|            |                          | Control vs. 1000                       | 7,81      | -4,336 to 19,96   | No           | ns      | 0,3577              |
|            |                          | Control vs. 10000                      | 22,26     | 10,11 to 34,4     | Yes          | ****    | <0,0001             |
|            | Reduced-serum conditions | Control vs. 0.1                        | 12,84     | 2,448 to 23,23    | Yes          | **      | 0,0089              |
|            |                          | Control vs. 1                          | 12,31     | 0,5389 to 24,08   | Yes          | *       | 0,0367              |
|            |                          | Control vs. 10                         | 9,734     | -2,037 to 21,5    | No           | ns      | 0,1440              |
|            |                          | Control vs. 100                        | 3,095     | -8,676 to 14,87   | No           | ns      | 0,9612              |
|            |                          | Control vs. 1000                       | 19,68     | 7,911 to 31,45    | Yes          | ***     | 0,0002              |
|            |                          | Control vs. 10000                      | 27,9      | 16,13 to 39,67    | Yes          | ****    | <0,0001             |
|            | Serum-free conditions    | Control vs. 0.1                        | 49,18     | 36 to 62,35       | Yes          | ****    | <0,0001             |
|            |                          | Control vs. 1                          | 50,45     | 35,52 to 65,37    | Yes          | ****    | <0,0001             |
|            |                          | Control vs. 10                         | 45,06     | 30,13 to 59,98    | Yes          | ****    | <0,0001             |
|            |                          | Control vs. 100                        | 48,84     | 33,91 to 63,77    | Yes          | ****    | <0,0001             |
|            |                          | Control vs. 1000                       | 47,74     | 32,81 to 62,67    | Yes          | ****    | <0,0001             |
|            |                          | Control vs. 10000                      | 57,61     | 42,68 to 72,54    | Yes          | ****    | <0,0001             |
| <b>DNA</b> | Normal serum conditions  | Control vs. 0.1                        | 5,104     | -20,4 to 30,61    | No           | ns      | 0,9955              |
|            |                          | Control vs. 1                          | -6,702    | -32,21 to 18,8    | No           | ns      | 0,9811              |
|            |                          | Control vs. 10                         | -4,492    | -30 to 21,01      | No           | ns      | 0,9978              |
|            |                          | Control vs. 100                        | -14,51    | -40,02 to 10,99   | No           | ns      | 0,5691              |
|            |                          | Control vs. 1000                       | -19,13    | -44,64 to 6,371   | No           | ns      | 0,2515              |
|            |                          | Control vs. 10000                      | -8,235    | -33,74 to 17,27   | No           | ns      | 0,9485              |
|            | Reduced-serum conditions | Control vs. 0.1                        | 4,228     | -15,55 to 24,01   | No           | ns      | 0,9859              |
|            |                          | Control vs. 1                          | -4,213    | -25,92 to 17,5    | No           | ns      | 0,9916              |
|            |                          | Control vs. 10                         | -10,72    | -32,43 to 10,99   | No           | ns      | 0,6238              |
|            |                          | Control vs. 100                        | -14,69    | -36,4 to 7,016    | No           | ns      | 0,3089              |
|            |                          | Control vs. 1000                       | -22,3     | -44,01 to -0,5931 | Yes          | *       | 0,0416              |
|            |                          | Control vs. 10000                      | -6,798    | -28,51 to 14,91   | No           | ns      | 0,9179              |
|            | Serum-free conditions    | Control vs. 0.1                        | 34,5      | 17,52 to 51,49    | Yes          | ****    | <0,0001             |
|            |                          | Control vs. 1                          | 31,47     | 13,68 to 49,26    | Yes          | ****    | <0,0001             |
|            |                          | Control vs. 10                         | 28,46     | 10,67 to 46,24    | Yes          | ***     | 0,0004              |
|            |                          | Control vs. 100                        | 10,7      | -7,088 to 28,49   | No           | ns      | 0,4234              |
|            |                          | Control vs. 1000                       | 1,736     | -24,05 to 27,53   | No           | ns      | 0,9997              |
|            |                          | Control vs. 10000                      | 40,48     | 10,91 to 70,05    | Yes          | **      | 0,0029              |
| <b>LDH</b> | Normal serum conditions  | Control vs. 0.1                        | 3,27      | -6,446 to 12,99   | No           | ns      | 0,8898              |
|            |                          | Control vs. 1                          | 4,775     | -6,251 to 15,8    | No           | ns      | 0,7370              |
|            |                          | Control vs. 10                         | 1,884     | -9,142 to 12,91   | No           | ns      | 0,9950              |
|            |                          | Control vs. 100                        | 0,9095    | -10,12 to 11,94   | No           | ns      | 0,9997              |
|            |                          | Control vs. 1000                       | 0,8482    | -10,18 to 11,87   | No           | ns      | 0,9997              |
|            |                          | Control vs. 10000                      | -5,734    | -19 to 7,53       | No           | ns      | 0,7385              |
|            | Reduced-serum conditions | Control vs. 0.1                        | 12,84     | 1,714 to 23,97    | Yes          | *       | 0,0167              |
|            |                          | Control vs. 1                          | 9,875     | -2,751 to 22,5    | No           | ns      | 0,1839              |
|            |                          | Control vs. 10                         | 1,873     | -10,75 to 14,5    | No           | ns      | 0,9977              |
|            |                          | Control vs. 100                        | 3,63      | -8,995 to 16,26   | No           | ns      | 0,9424              |
|            |                          | Control vs. 1000                       | 5,01      | -7,616 to 17,64   | No           | ns      | 0,8007              |
|            |                          | Control vs. 10000                      | 10,71     | -1,92 to 23,33    | No           | ns      | 0,1281              |
|            | Serum-free conditions    | Control vs. 0.1                        | 26,42     | 12,6 to 40,23     | Yes          | ****    | <0,0001             |
|            |                          | Control vs. 1                          | 26,98     | 11,3 to 42,66     | Yes          | ***     | 0,0001              |
|            |                          | Control vs. 10                         | 29,7      | 14,02 to 45,38    | Yes          | ****    | <0,0001             |
|            |                          | Control vs. 100                        | 24,56     | 8,883 to 40,24    | Yes          | ***     | 0,0005              |
|            |                          | Control vs. 1000                       | -11,21    | -26,89 to 4,468   | No           | ns      | 0,2577              |
|            |                          | Control vs. 10000                      | -44,61    | -63,47 to -25,74  | Yes          | ****    | <0,0001             |

TABLE S-8: EGG WHITE ALCALASE

|            |                          | DUNNETT'S MULTIPLE COMPARISONS TEST | MEAN DIFF | 95,00% CI OF DIFF | SIGNIFICANT? | SUMMARY | ADJUSTED P VALUE |
|------------|--------------------------|-------------------------------------|-----------|-------------------|--------------|---------|------------------|
| <b>ATP</b> | Normal serum conditions  | Control vs. 0.1                     | -32,51    | -56,77 to -8,244  | Yes          | **      | 0,0037           |
|            |                          | Control vs. 1                       | -33,39    | -57,65 to -9,128  | Yes          | **      | 0,0027           |
|            |                          | Control vs. 10                      | -34,66    | -58,92 to -10,4   | Yes          | **      | 0,0017           |
|            |                          | Control vs. 100                     | -33,33    | -57,59 to -9,072  | Yes          | **      | 0,0027           |
|            |                          | Control vs. 1000                    | -28,38    | -52,65 to -4,124  | Yes          | *       | 0,0147           |
|            |                          | Control vs. 10000                   | 29,19     | 4,929 to 53,45    | Yes          | *       | 0,0114           |
|            | Reduced-serum conditions | Control vs. 0.1                     | -13,92    | -36,74 to 8,895   | No           | ns      | 0,4114           |
|            |                          | Control vs. 1                       | -17,61    | -40,43 to 5,203   | No           | ns      | 0,1942           |
|            |                          | Control vs. 10                      | -13,78    | -36,6 to 9,032    | No           | ns      | 0,4214           |
|            |                          | Control vs. 100                     | -10,94    | -33,76 to 11,87   | No           | ns      | 0,6508           |
|            |                          | Control vs. 1000                    | -10,84    | -33,65 to 11,98   | No           | ns      | 0,6595           |
|            |                          | Control vs. 10000                   | 32,84     | 10,03 to 55,66    | Yes          | **      | 0,0015           |
|            | Serum-free conditions    | Control vs. 0.1                     | 21,49     | 6,615 to 36,37    | Yes          | **      | 0,0015           |
|            |                          | Control vs. 1                       | 13,86     | -1,017 to 28,74   | No           | ns      | 0,0777           |
|            |                          | Control vs. 10                      | 16,2      | 1,32 to 31,08     | Yes          | *       | 0,0271           |
|            |                          | Control vs. 100                     | 18,27     | 3,392 to 33,15    | Yes          | **      | 0,0094           |
|            |                          | Control vs. 1000                    | 20,33     | 5,451 to 35,21    | Yes          | **      | 0,0030           |
|            |                          | Control vs. 10000                   | 56,88     | 43,75 to 70,02    | Yes          | ****    | <0,0001          |
| <b>DNA</b> | Normal serum conditions  | Control vs. 0.1                     | -18,87    | -36,01 to -1,731  | Yes          | *       | 0,0247           |
|            |                          | Control vs. 1                       | -20,62    | -37,76 to -3,477  | Yes          | *       | 0,0114           |
|            |                          | Control vs. 10                      | -18,47    | -35,61 to -1,324  | Yes          | *       | 0,0293           |
|            |                          | Control vs. 100                     | -16,27    | -33,41 to 0,8697  | No           | ns      | 0,0696           |
|            |                          | Control vs. 1000                    | -27,98    | -45,12 to -10,84  | Yes          | ***     | 0,0002           |
|            |                          | Control vs. 10000                   | -23,68    | -43,1 to -4,267   | Yes          | **      | 0,0100           |
|            | Reduced-serum conditions | Control vs. 0.1                     | -9,027    | -24,92 to 6,864   | No           | ns      | 0,4844           |
|            |                          | Control vs. 1                       | -6,701    | -22,59 to 9,19    | No           | ns      | 0,7582           |
|            |                          | Control vs. 10                      | -0,7502   | -16,64 to 15,14   | No           | ns      | 0,9998           |
|            |                          | Control vs. 100                     | 3,451     | -12,44 to 19,34   | No           | ns      | 0,9846           |
|            |                          | Control vs. 1000                    | -12,17    | -28,06 to 3,724   | No           | ns      | 0,2006           |
|            |                          | Control vs. 10000                   | -25,9     | -41,8 to -10,01   | Yes          | ***     | 0,0003           |
|            | Serum-free conditions    | Control vs. 0.1                     | 17,28     | 3,076 to 31,48    | Yes          | *       | 0,0102           |
|            |                          | Control vs. 1                       | 15,22     | 1,019 to 29,42    | Yes          | *       | 0,0305           |
|            |                          | Control vs. 10                      | 20,27     | 6,073 to 34,47    | Yes          | **      | 0,0017           |
|            |                          | Control vs. 100                     | 18,32     | 4,119 to 32,52    | Yes          | **      | 0,0056           |
|            |                          | Control vs. 1000                    | 8,19      | -6,009 to 22,39   | No           | ns      | 0,4688           |
|            |                          | Control vs. 10000                   | -7,071    | -21,27 to 7,129   | No           | ns      | 0,6156           |
| <b>LDH</b> | Normal serum conditions  | Control vs. 0.1                     | 8,317     | -0,6519 to 17,29  | No           | ns      | 0,0799           |
|            |                          | Control vs. 1                       | 10,58     | 1,614 to 19,55    | Yes          | *       | 0,0137           |
|            |                          | Control vs. 10                      | 11,15     | 2,183 to 20,12    | Yes          | **      | 0,0083           |
|            |                          | Control vs. 100                     | 12,08     | 3,11 to 21,05     | Yes          | **      | 0,0035           |
|            |                          | Control vs. 1000                    | 8,193     | -0,7759 to 17,16  | No           | ns      | 0,0869           |
|            |                          | Control vs. 10000                   | -9,373    | -18,34 to -0,4039 | Yes          | *       | 0,0368           |
|            | Reduced-serum conditions | Control vs. 0.1                     | 26,2      | 20 to 32,4        | Yes          | ****    | <0,0001          |
|            |                          | Control vs. 1                       | 28,05     | 21,84 to 34,25    | Yes          | ****    | <0,0001          |
|            |                          | Control vs. 10                      | 26,73     | 20,52 to 32,93    | Yes          | ****    | <0,0001          |
|            |                          | Control vs. 100                     | 25,66     | 19,45 to 31,86    | Yes          | ****    | <0,0001          |
|            |                          | Control vs. 1000                    | 19,29     | 13,09 to 25,5     | Yes          | ****    | <0,0001          |
|            |                          | Control vs. 10000                   | 2,495     | -3,708 to 8,698   | No           | ns      | 0,7914           |
|            | Serum-free conditions    | Control vs. 0.1                     | 24,14     | 14,57 to 33,72    | Yes          | ****    | <0,0001          |
|            |                          | Control vs. 1                       | 28,84     | 19,27 to 38,41    | Yes          | ****    | <0,0001          |
|            |                          | Control vs. 10                      | 28,19     | 18,62 to 37,77    | Yes          | ****    | <0,0001          |
|            |                          | Control vs. 100                     | 30,63     | 21,06 to 40,2     | Yes          | ****    | <0,0001          |
|            |                          | Control vs. 1000                    | 21,08     | 11,51 to 30,66    | Yes          | ****    | <0,0001          |
|            |                          | Control vs. 10000                   | 11,67     | 2,1 to 21,24      | Yes          | *       | 0,0100           |

TABLE S-9: EGG WHITE FLAVOURZYME

|            |                          | DUNNETT'S MULTIPLE COMPARISONS TEST | MEAN DIFF | 95,00% CI OF DIFF | SIGNIFICANT? | SUMMARY | ADJUSTED P VALUE |
|------------|--------------------------|-------------------------------------|-----------|-------------------|--------------|---------|------------------|
| <b>ATP</b> | Normal serum conditions  | Control vs. 0.1                     | -2,847    | -14,39 to 8,694   | No           | ns      | 0,9713           |
|            |                          | Control vs. 1                       | -7,497    | -19,04 to 4,043   | No           | ns      | 0,3483           |
|            |                          | Control vs. 10                      | -8,009    | -19,55 to 3,532   | No           | ns      | 0,2852           |
|            |                          | Control vs. 100                     | -17,02    | -28,56 to -5,482  | Yes          | **      | 0,0011           |
|            |                          | Control vs. 1000                    | -23,65    | -35,19 to -12,1   | Yes          | ****    | <0,0001          |
|            |                          | Control vs. 10000                   | 10,05     | -3,021 to 23,13   | No           | ns      | 0,1971           |
|            | Reduced-serum conditions | Control vs. 0.1                     | 11,09     | -0,7085 to 22,9   | No           | ns      | 0,0738           |
|            |                          | Control vs. 1                       | 8,357     | -3,445 to 20,16   | No           | ns      | 0,2669           |
|            |                          | Control vs. 10                      | 5,973     | -5,828 to 17,78   | No           | ns      | 0,6001           |
|            |                          | Control vs. 100                     | 4,728     | -7,074 to 16,53   | No           | ns      | 0,7949           |
|            |                          | Control vs. 1000                    | -0,339    | -12,14 to 11,46   | No           | ns      | >0,9999          |
|            |                          | Control vs. 10000                   | 7,718     | -4,084 to 19,52   | No           | ns      | 0,3421           |
|            | Serum-free conditions    | Control vs. 0.1                     | 43,62     | 32,11 to 55,13    | Yes          | ****    | <0,0001          |
|            |                          | Control vs. 1                       | 38,57     | 27,05 to 50,08    | Yes          | ****    | <0,0001          |
|            |                          | Control vs. 10                      | 45,98     | 34,47 to 57,49    | Yes          | ****    | <0,0001          |
|            |                          | Control vs. 100                     | 39,91     | 27,03 to 52,79    | Yes          | ****    | <0,0001          |
|            |                          | Control vs. 1000                    | 45,13     | 33,62 to 56,65    | Yes          | ****    | <0,0001          |
|            |                          | Control vs. 10000                   | 36,61     | 25,62 to 47,6     | Yes          | ****    | <0,0001          |
| <b>DNA</b> | Normal serum conditions  | Control vs. 0.1                     | -0,9177   | -17,17 to 15,33   | No           | ns      | 0,9998           |
|            |                          | Control vs. 1                       | -10,7     | -26,95 to 5,551   | No           | ns      | 0,3340           |
|            |                          | Control vs. 10                      | -17,99    | -34,24 to -1,747  | Yes          | *       | 0,0237           |
|            |                          | Control vs. 100                     | -18,06    | -34,31 to -1,816  | Yes          | *       | 0,0229           |
|            |                          | Control vs. 1000                    | -21,17    | -37,42 to -4,919  | Yes          | **      | 0,0051           |
|            |                          | Control vs. 10000                   | -10,46    | -28,64 to 7,721   | No           | ns      | 0,4697           |
|            | Reduced-serum conditions | Control vs. 0.1                     | 4,752     | -10,04 to 19,54   | No           | ns      | 0,9079           |
|            |                          | Control vs. 1                       | 5,031     | -9,762 to 19,82   | No           | ns      | 0,8847           |
|            |                          | Control vs. 10                      | 3,434     | -11,36 to 18,23   | No           | ns      | 0,9783           |
|            |                          | Control vs. 100                     | -1,254    | -16,05 to 13,54   | No           | ns      | 0,9997           |
|            |                          | Control vs. 1000                    | -5,382    | -20,17 to 9,411   | No           | ns      | 0,8519           |
|            |                          | Control vs. 10000                   | -10,48    | -25,28 to 4,31    | No           | ns      | 0,2653           |
|            | Serum-free conditions    | Control vs. 0.1                     | 23,96     | 0,3077 to 47,61   | Yes          | *       | 0,0459           |
|            |                          | Control vs. 1                       | 20,66     | -2,986 to 44,31   | No           | ns      | 0,1101           |
|            |                          | Control vs. 10                      | 16,57     | -7,078 to 40,22   | No           | ns      | 0,2752           |
|            |                          | Control vs. 100                     | 18,07     | -5,576 to 41,72   | No           | ns      | 0,2012           |
|            |                          | Control vs. 1000                    | -9,614    | -33,26 to 14,04   | No           | ns      | 0,7830           |
|            |                          | Control vs. 10000                   | -74,87    | -103,3 to -46,48  | Yes          | ****    | <0,0001          |
| <b>LDH</b> | Normal serum conditions  | Control vs. 0.1                     | 16,94     | 9,279 to 24,59    | Yes          | ****    | <0,0001          |
|            |                          | Control vs. 1                       | 15,26     | 7,601 to 22,91    | Yes          | ****    | <0,0001          |
|            |                          | Control vs. 10                      | 14,99     | 7,333 to 22,65    | Yes          | ****    | <0,0001          |
|            |                          | Control vs. 100                     | 15,81     | 8,152 to 23,46    | Yes          | ****    | <0,0001          |
|            |                          | Control vs. 1000                    | 14,95     | 7,291 to 22,6     | Yes          | ****    | <0,0001          |
|            |                          | Control vs. 10000                   | 16,57     | 8,915 to 24,23    | Yes          | ****    | <0,0001          |
|            | Reduced-serum conditions | Control vs. 0.1                     | 23,72     | 13,29 to 34,15    | Yes          | ****    | <0,0001          |
|            |                          | Control vs. 1                       | 24,52     | 14,09 to 34,95    | Yes          | ****    | <0,0001          |
|            |                          | Control vs. 10                      | 25,33     | 14,9 to 35,76     | Yes          | ****    | <0,0001          |
|            |                          | Control vs. 100                     | 24,63     | 14,2 to 35,06     | Yes          | ****    | <0,0001          |
|            |                          | Control vs. 1000                    | 20,7      | 10,27 to 31,13    | Yes          | ****    | <0,0001          |
|            |                          | Control vs. 10000                   | 22,1      | 11,67 to 32,53    | Yes          | ****    | <0,0001          |
|            | Serum-free conditions    | Control vs. 0.1                     | 31,52     | 16,45 to 46,59    | Yes          | ****    | <0,0001          |
|            |                          | Control vs. 1                       | 33,42     | 18,34 to 48,49    | Yes          | ****    | <0,0001          |
|            |                          | Control vs. 10                      | 33,84     | 18,77 to 48,91    | Yes          | ****    | <0,0001          |
|            |                          | Control vs. 100                     | 33,23     | 18,16 to 48,3     | Yes          | ****    | <0,0001          |
|            |                          | Control vs. 1000                    | 23,14     | 8,07 to 38,21     | Yes          | ***     | 0,0006           |
|            |                          | Control vs. 10000                   | -41,04    | -56,11 to -25,97  | Yes          | ****    | <0,0001          |

TABLE S-10: YEAST EXTRACT

|            |                          | DUNNETT'S MULTIPLE COMPARISONS TEST | MEAN DIFF | 95,00% CI OF DIFF  | SIGNIFICANT? | SUMMARY | ADJUSTED P VALUE |
|------------|--------------------------|-------------------------------------|-----------|--------------------|--------------|---------|------------------|
| <b>ATP</b> | Normal serum conditions  | Control vs. 0.1                     | -71,56    | -104,6 to -38,47   | Yes          | ****    | <0,0001          |
|            |                          | Control vs. 1                       | -77,38    | -110,5 to -44,29   | Yes          | ****    | <0,0001          |
|            |                          | Control vs. 10                      | -100,4    | -136,7 to -64,06   | Yes          | ****    | <0,0001          |
|            |                          | Control vs. 100                     | -108,8    | -145,2 to -72,52   | Yes          | ****    | <0,0001          |
|            |                          | Control vs. 1000                    | -101,6    | -137,9 to -65,3    | Yes          | ****    | <0,0001          |
|            |                          | Control vs. 10000                   | 77,88     | 44,79 to 111       | Yes          | ****    | <0,0001          |
|            | Reduced-serum conditions | Control vs. 0.1                     | -42,36    | -70,48 to -14,24   | Yes          | ***     | 0,0008           |
|            |                          | Control vs. 1                       | -40,34    | -68,46 to -12,22   | Yes          | **      | 0,0016           |
|            |                          | Control vs. 10                      | -46,11    | -74,23 to -17,98   | Yes          | ***     | 0,0002           |
|            |                          | Control vs. 100                     | -45,82    | -73,94 to -17,7    | Yes          | ***     | 0,0002           |
|            |                          | Control vs. 1000                    | -50,97    | -79,09 to -22,85   | Yes          | ****    | <0,0001          |
|            |                          | Control vs. 10000                   | 68,16     | 40,03 to 96,28     | Yes          | ****    | <0,0001          |
|            | Serum-free conditions    | Control vs. 0.1                     | -58,48    | -102,5 to -14,46   | Yes          | **      | 0,0040           |
|            |                          | Control vs. 1                       | -40,56    | -75,97 to -5,161   | Yes          | *       | 0,0177           |
|            |                          | Control vs. 10                      | -27,21    | -66,07 to 11,65    | No           | ns      | 0,2774           |
|            |                          | Control vs. 100                     | -37,64    | -76,5 to 1,219     | No           | ns      | 0,0615           |
|            |                          | Control vs. 1000                    | -45,2     | -80,6 to -9,797    | Yes          | **      | 0,0062           |
|            |                          | Control vs. 10000                   | 18,08     | -17,32 to 53,48    | No           | ns      | 0,5918           |
| <b>DNA</b> | Normal serum conditions  | Control vs. 0.1                     | -6,546    | -23,75 to 10,66    | No           | ns      | 0,8285           |
|            |                          | Control vs. 1                       | -8,479    | -25,69 to 8,729    | No           | ns      | 0,6264           |
|            |                          | Control vs. 10                      | -14,36    | -31,56 to 2,853    | No           | ns      | 0,1389           |
|            |                          | Control vs. 100                     | -39,71    | -56,91 to -22,5    | Yes          | ****    | <0,0001          |
|            |                          | Control vs. 1000                    | -19,2     | -38,08 to -0,3133  | Yes          | *       | 0,0447           |
|            |                          | Control vs. 10000                   | 27,83     | 8,945 to 46,71     | Yes          | **      | 0,0011           |
|            | Reduced-serum conditions | Control vs. 0.1                     | 8,657     | -14,81 to 32,12    | No           | ns      | 0,8964           |
|            |                          | Control vs. 1                       | 5,551     | -17,91 to 29,02    | No           | ns      | 0,9874           |
|            |                          | Control vs. 10                      | 5,716     | -17,75 to 29,18    | No           | ns      | 0,9852           |
|            |                          | Control vs. 100                     | -5,412    | -28,88 to 18,05    | No           | ns      | 0,9891           |
|            |                          | Control vs. 1000                    | -23,53    | -46,99 to -0,05937 | Yes          | *       | 0,0491           |
|            |                          | Control vs. 10000                   | -10,66    | -34,12 to 12,81    | No           | ns      | 0,7713           |
|            | Serum-free conditions    | Control vs. 0.1                     | 14,21     | -2,147 to 30,57    | No           | ns      | 0,1137           |
|            |                          | Control vs. 1                       | 9,832     | -6,529 to 26,19    | No           | ns      | 0,4268           |
|            |                          | Control vs. 10                      | 11,15     | -5,21 to 27,51     | No           | ns      | 0,3022           |
|            |                          | Control vs. 100                     | 6,507     | -9,854 to 22,87    | No           | ns      | 0,7996           |
|            |                          | Control vs. 1000                    | 9,908     | -6,453 to 26,27    | No           | ns      | 0,4190           |
|            |                          | Control vs. 10000                   | -13,19    | -29,55 to 3,17     | No           | ns      | 0,1617           |
| <b>LDH</b> | Normal serum conditions  | Control vs. 0.1                     | 4,461     | -8,524 to 17,45    | No           | ns      | 0,8814           |
|            |                          | Control vs. 1                       | 6,021     | -6,964 to 19,01    | No           | ns      | 0,6811           |
|            |                          | Control vs. 10                      | 5,9       | -7,085 to 18,89    | No           | ns      | 0,6987           |
|            |                          | Control vs. 100                     | 5,998     | -6,988 to 18,98    | No           | ns      | 0,6845           |
|            |                          | Control vs. 1000                    | 8,365     | -4,62 to 21,35     | No           | ns      | 0,3570           |
|            |                          | Control vs. 10000                   | -45,48    | -58,47 to -32,49   | Yes          | ****    | <0,0001          |
|            | Reduced-serum conditions | Control vs. 0.1                     | 11,15     | -5,898 to 28,2     | No           | ns      | 0,3450           |
|            |                          | Control vs. 1                       | 11,91     | -5,138 to 28,96    | No           | ns      | 0,2818           |
|            |                          | Control vs. 10                      | -3,237    | -20,28 to 13,81    | No           | ns      | 0,9927           |
|            |                          | Control vs. 100                     | 15,26     | -1,789 to 32,31    | No           | ns      | 0,0979           |
|            |                          | Control vs. 1000                    | 9,705     | -7,342 to 26,75    | No           | ns      | 0,4861           |
|            |                          | Control vs. 10000                   | -51,09    | -68,13 to -34,04   | Yes          | ****    | <0,0001          |
|            | Serum-free conditions    | Control vs. 0.1                     | 32,42     | 17,94 to 46,89     | Yes          | ****    | <0,0001          |
|            |                          | Control vs. 1                       | 36,03     | 21,56 to 50,51     | Yes          | ****    | <0,0001          |
|            |                          | Control vs. 10                      | 33,86     | 19,39 to 48,33     | Yes          | ****    | <0,0001          |
|            |                          | Control vs. 100                     | 35,94     | 21,47 to 50,41     | Yes          | ****    | <0,0001          |
|            |                          | Control vs. 1000                    | 31,09     | 16,61 to 45,56     | Yes          | ****    | <0,0001          |
|            |                          | Control vs. 10000                   | 19,03     | 4,56 to 33,51      | Yes          | **      | 0,0045           |

TABLE S-11: PORSK PLASMA

|            |                          | DUNNETT'S MULTIPLE COMPARISONS TEST | MEAN DIFF | 95,00% CI OF DIFF | SIGNIFICANT? | SUMMARY | ADJUSTED P VALUE |
|------------|--------------------------|-------------------------------------|-----------|-------------------|--------------|---------|------------------|
| <b>ATP</b> | Normal serum conditions  | Control vs. 0.1                     | -13,04    | -25,52 to -0,5571 | Yes          | *       | 0,0370           |
|            |                          | Control vs. 1                       | -14,65    | -27,81 to -1,501  | Yes          | *       | 0,0226           |
|            |                          | Control vs. 10                      | -11,8     | -24,95 to 1,359   | No           | ns      | 0,0962           |
|            |                          | Control vs. 100                     | 1,939     | -11,21 to 15,09   | No           | ns      | 0,9977           |
|            |                          | Control vs. 1000                    | 48,41     | 35,93 to 60,89    | Yes          | ****    | <0,0001          |
|            |                          | Control vs. 10000                   | 87,62     | 75,13 to 100,1    | Yes          | ****    | <0,0001          |
|            | Reduced-serum conditions | Control vs. 0.1                     | -17,08    | -28,28 to -5,883  | Yes          | ***     | 0,0007           |
|            |                          | Control vs. 1                       | -16,29    | -27,49 to -5,092  | Yes          | **      | 0,0014           |
|            |                          | Control vs. 10                      | -13,37    | -24,57 to -2,173  | Yes          | *       | 0,0123           |
|            |                          | Control vs. 100                     | -2,501    | -13,7 to 8,698    | No           | ns      | 0,9821           |
|            |                          | Control vs. 1000                    | 42,58     | 31,38 to 53,77    | Yes          | ****    | <0,0001          |
|            |                          | Control vs. 10000                   | 88,22     | 77,02 to 99,42    | Yes          | ****    | <0,0001          |
|            | Serum-free conditions    | Control vs. 0.1                     | 1,506     | -9,473 to 12,49   | No           | ns      | 0,9980           |
|            |                          | Control vs. 1                       | 0,3312    | -10,65 to 11,31   | No           | ns      | 0,9999           |
|            |                          | Control vs. 10                      | -0,5427   | -11,52 to 10,44   | No           | ns      | 0,9998           |
|            |                          | Control vs. 100                     | 8,952     | -2,028 to 19,93   | No           | ns      | 0,1535           |
|            |                          | Control vs. 1000                    | 47,67     | 36,69 to 58,65    | Yes          | ****    | <0,0001          |
|            |                          | Control vs. 10000                   | 89,47     | 78,49 to 100,5    | Yes          | ****    | <0,0001          |
| <b>DNA</b> | Normal serum conditions  | Control vs. 0.1                     | 16,45     | -3,081 to 35,98   | No           | ns      | 0,1320           |
|            |                          | Control vs. 1                       | -3,735    | -24,31 to 16,84   | No           | ns      | 0,9937           |
|            |                          | Control vs. 10                      | -0,4781   | -20,01 to 19,05   | No           | ns      | >0,9999          |
|            |                          | Control vs. 100                     | -27,42    | -47,99 to -6,84   | Yes          | **      | 0,0040           |
|            |                          | Control vs. 1000                    | -19,58    | -40,15 to 1,002   | No           | ns      | 0,0686           |
|            |                          | Control vs. 10000                   | 17,81     | -1,72 to 37,34    | No           | ns      | 0,0876           |
|            | Reduced-serum conditions | Control vs. 0.1                     | -15,17    | -39,92 to 9,582   | No           | ns      | 0,4053           |
|            |                          | Control vs. 1                       | -14,76    | -39,52 to 9,989   | No           | ns      | 0,4329           |
|            |                          | Control vs. 10                      | -34,64    | -59,39 to -9,887  | Yes          | **      | 0,0023           |
|            |                          | Control vs. 100                     | -39,12    | -63,88 to -14,37  | Yes          | ***     | 0,0004           |
|            |                          | Control vs. 1000                    | -20,09    | -46,17 to 5,988   | No           | ns      | 0,1950           |
|            |                          | Control vs. 10000                   | -3,459    | -28,21 to 21,29   | No           | ns      | 0,9979           |
|            | Serum-free conditions    | Control vs. 0.1                     | -17,05    | -41,12 to 7,008   | No           | ns      | 0,2651           |
|            |                          | Control vs. 1                       | -40,92    | -64,99 to -16,86  | Yes          | ***     | 0,0001           |
|            |                          | Control vs. 10                      | -57,63    | -81,69 to -33,57  | Yes          | ****    | <0,0001          |
|            |                          | Control vs. 100                     | -40,69    | -64,76 to -16,63  | Yes          | ***     | 0,0001           |
|            |                          | Control vs. 1000                    | -28,58    | -53,93 to -3,224  | Yes          | *       | 0,0205           |
|            |                          | Control vs. 10000                   | -5,168    | -29,23 to 18,89   | No           | ns      | 0,9852           |
| <b>LDH</b> | Normal serum conditions  | Control vs. 0.1                     | -15,83    | -34,63 to 2,975   | No           | ns      | 0,1471           |
|            |                          | Control vs. 1                       | -15,81    | -34,61 to 2,992   | No           | ns      | 0,1479           |
|            |                          | Control vs. 10                      | -17,93    | -36,74 to 0,8699  | No           | ns      | 0,0698           |
|            |                          | Control vs. 100                     | -25,15    | -43,96 to -6,349  | Yes          | **      | 0,0030           |
|            |                          | Control vs. 1000                    | -53,79    | -72,59 to -34,99  | Yes          | ****    | <0,0001          |
|            |                          | Control vs. 10000                   | -134      | -152,8 to -115,2  | Yes          | ****    | <0,0001          |
|            | Reduced-serum conditions | Control vs. 0.1                     | 27,58     | 8,528 to 46,63    | Yes          | **      | 0,0014           |
|            |                          | Control vs. 1                       | 23,8      | 4,744 to 42,85    | Yes          | **      | 0,0079           |
|            |                          | Control vs. 10                      | 19,47     | 0,4188 to 38,53   | Yes          | *       | 0,0431           |
|            |                          | Control vs. 100                     | 13,26     | -5,798 to 32,31   | No           | ns      | 0,2825           |
|            |                          | Control vs. 1000                    | -30,09    | -49,14 to -11,03  | Yes          | ***     | 0,0004           |
|            |                          | Control vs. 10000                   | -115,6    | -134,7 to -96,57  | Yes          | ****    | <0,0001          |
|            | Serum-free conditions    | Control vs. 0.1                     | 55,12     | 37,72 to 72,51    | Yes          | ****    | <0,0001          |
|            |                          | Control vs. 1                       | 51,22     | 33,83 to 68,62    | Yes          | ****    | <0,0001          |
|            |                          | Control vs. 10                      | 47,83     | 30,44 to 65,23    | Yes          | ****    | <0,0001          |
|            |                          | Control vs. 100                     | 41,11     | 23,72 to 58,51    | Yes          | ****    | <0,0001          |
|            |                          | Control vs. 1000                    | 12,44     | -4,954 to 29,84   | No           | ns      | 0,2576           |
|            |                          | Control vs. 10000                   | -75,91    | -93,31 to -58,52  | Yes          | ****    | <0,0001          |

TABLE S-12: PORK PLASMA ALCALASE

|            |                          | DUNNETT'S MULTIPLE COMPARISONS TEST | MEAN DIFF | 95,00% CI OF DIFF | SIGNIFICANT? | SUMMARY | ADJUSTED P VALUE |
|------------|--------------------------|-------------------------------------|-----------|-------------------|--------------|---------|------------------|
| <b>ATP</b> | Normal serum conditions  | Control vs. 0.1                     | -169,2    | -233 to -105,5    | Yes          | ****    | <0,0001          |
|            |                          | Control vs. 1                       | -170,4    | -234,2 to -106,7  | Yes          | ****    | <0,0001          |
|            |                          | Control vs. 10                      | -154,7    | -218,4 to -90,91  | Yes          | ****    | <0,0001          |
|            |                          | Control vs. 100                     | -95,74    | -159,5 to -31,98  | Yes          | ***     | 0,0009           |
|            |                          | Control vs. 1000                    | 39,68     | -27,51 to 106,9   | No           | ns      | 0,4434           |
|            |                          | Control vs. 10000                   | 98,53     | 34,77 to 162,3    | Yes          | ***     | 0,0006           |
|            | Reduced-serum conditions | Control vs. 0.1                     | -155,8    | -206,3 to -105,3  | Yes          | ****    | <0,0001          |
|            |                          | Control vs. 1                       | -141,6    | -192,1 to -91,14  | Yes          | ****    | <0,0001          |
|            |                          | Control vs. 10                      | -126,7    | -177,2 to -76,25  | Yes          | ****    | <0,0001          |
|            |                          | Control vs. 100                     | -54,06    | -104,5 to -3,571  | Yes          | *       | 0,0308           |
|            |                          | Control vs. 1000                    | 95,37     | 44,88 to 145,8    | Yes          | ****    | <0,0001          |
|            |                          | Control vs. 10000                   | 99,58     | 49,09 to 150,1    | Yes          | ****    | <0,0001          |
|            | Serum-free conditions    | Control vs. 0.1                     | -110,9    | -151,1 to -70,72  | Yes          | ****    | <0,0001          |
|            |                          | Control vs. 1                       | -104,6    | -144,8 to -64,35  | Yes          | ****    | <0,0001          |
|            |                          | Control vs. 10                      | -77,86    | -118,1 to -37,65  | Yes          | ****    | <0,0001          |
|            |                          | Control vs. 100                     | 48,15     | 7,939 to 88,35    | Yes          | *       | 0,0120           |
|            |                          | Control vs. 1000                    | 98,74     | 58,54 to 139      | Yes          | ****    | <0,0001          |
|            |                          | Control vs. 10000                   | 99,79     | 59,58 to 140      | Yes          | ****    | <0,0001          |
| <b>DNA</b> | Normal serum conditions  | Control vs. 0.1                     | -46,5     | -66,68 to -26,32  | Yes          | ****    | <0,0001          |
|            |                          | Control vs. 1                       | -57,79    | -76,95 to -38,64  | Yes          | ****    | <0,0001          |
|            |                          | Control vs. 10                      | -62,04    | -82,22 to -41,86  | Yes          | ****    | <0,0001          |
|            |                          | Control vs. 100                     | -41,55    | -60,7 to -22,4    | Yes          | ****    | <0,0001          |
|            |                          | Control vs. 1000                    | -2,408    | -22,59 to 17,77   | No           | ns      | 0,9995           |
|            |                          | Control vs. 10000                   | 94,58     | 75,42 to 113,7    | Yes          | ****    | <0,0001          |
|            | Reduced-serum conditions | Control vs. 0.1                     | -27       | -69,68 to 15,67   | No           | ns      | 0,3733           |
|            |                          | Control vs. 1                       | -38,57    | -81,24 to 4,106   | No           | ns      | 0,0921           |
|            |                          | Control vs. 10                      | -47,28    | -89,95 to -4,606  | Yes          | *       | 0,0236           |
|            |                          | Control vs. 100                     | -36,14    | -78,81 to 6,534   | No           | ns      | 0,1286           |
|            |                          | Control vs. 1000                    | 25,84     | -16,84 to 68,51   | No           | ns      | 0,4177           |
|            |                          | Control vs. 10000                   | 95,02     | 52,35 to 137,7    | Yes          | ****    | <0,0001          |
|            | Serum-free conditions    | Control vs. 0.1                     | -33,21    | -49,07 to -17,35  | Yes          | ****    | <0,0001          |
|            |                          | Control vs. 1                       | -23,1     | -38,96 to -7,241  | Yes          | **      | 0,0014           |
|            |                          | Control vs. 10                      | -31,73    | -47,59 to -15,87  | Yes          | ****    | <0,0001          |
|            |                          | Control vs. 100                     | 39,97     | 24,11 to 55,83    | Yes          | ****    | <0,0001          |
|            |                          | Control vs. 1000                    | 84,32     | 68,47 to 100,2    | Yes          | ****    | <0,0001          |
|            |                          | Control vs. 10000                   | 93,05     | 77,19 to 108,9    | Yes          | ****    | <0,0001          |
| <b>LDH</b> | Normal serum conditions  | Control vs. 0.1                     | -10,5     | -17,89 to -3,103  | Yes          | **      | 0,0019           |
|            |                          | Control vs. 1                       | -6,412    | -13,8 to 0,9807   | No           | ns      | 0,1146           |
|            |                          | Control vs. 10                      | -8,39     | -15,78 to -0,9979 | Yes          | *       | 0,0193           |
|            |                          | Control vs. 100                     | -5,865    | -13,26 to 1,528   | No           | ns      | 0,1732           |
|            |                          | Control vs. 1000                    | -4,907    | -12,3 to 2,486    | No           | ns      | 0,3269           |
|            |                          | Control vs. 10000                   | 64,95     | 57,56 to 72,34    | Yes          | ****    | <0,0001          |
|            | Reduced-serum conditions | Control vs. 0.1                     | 30,37     | 23,68 to 37,07    | Yes          | ****    | <0,0001          |
|            |                          | Control vs. 1                       | 31,38     | 24,68 to 38,08    | Yes          | ****    | <0,0001          |
|            |                          | Control vs. 10                      | 29,09     | 22,4 to 35,79     | Yes          | ****    | <0,0001          |
|            |                          | Control vs. 100                     | 25,17     | 18,48 to 31,87    | Yes          | ****    | <0,0001          |
|            |                          | Control vs. 1000                    | 64,57     | 57,88 to 71,27    | Yes          | ****    | <0,0001          |
|            |                          | Control vs. 10000                   | 66,65     | 59,96 to 73,35    | Yes          | ****    | <0,0001          |
|            | Serum-free conditions    | Control vs. 0.1                     | 71,46     | 65,75 to 77,16    | Yes          | ****    | <0,0001          |
|            |                          | Control vs. 1                       | 72,25     | 66,54 to 77,95    | Yes          | ****    | <0,0001          |
|            |                          | Control vs. 10                      | 71,01     | 65,31 to 76,72    | Yes          | ****    | <0,0001          |
|            |                          | Control vs. 100                     | 68,35     | 62,65 to 74,06    | Yes          | ****    | <0,0001          |
|            |                          | Control vs. 1000                    | 79,92     | 74,22 to 85,62    | Yes          | ****    | <0,0001          |
|            |                          | Control vs. 10000                   | 59,85     | 54,14 to 65,55    | Yes          | ****    | <0,0001          |

TABLE S-13: PORK PLASMA FLAVOURZYME

|            |                          | DUNNETT'S MULTIPLE COMPARISONS TEST | MEAN DIFF | 95,00% CI OF DIFF | SIGNIFICANT? | SUMMARY | ADJUSTED P VALUE |
|------------|--------------------------|-------------------------------------|-----------|-------------------|--------------|---------|------------------|
| <b>ATP</b> | Normal serum conditions  | Control vs. 0.1                     | -47,57    | -60,29 to -34,86  | Yes          | ****    | <0,0001          |
|            |                          | Control vs. 1                       | -46,94    | -59,65 to -34,22  | Yes          | ****    | <0,0001          |
|            |                          | Control vs. 10                      | -43,53    | -56,25 to -30,81  | Yes          | ****    | <0,0001          |
|            |                          | Control vs. 100                     | -21,27    | -33,98 to -8,551  | Yes          | ***     | 0,0002           |
|            |                          | Control vs. 1000                    | 43,72     | 31,01 to 56,44    | Yes          | ****    | <0,0001          |
|            |                          | Control vs. 10000                   | 96,33     | 83,61 to 109      | Yes          | ****    | <0,0001          |
|            | Reduced-serum conditions | Control vs. 0.1                     | -26,52    | -40,96 to -12,08  | Yes          | ****    | <0,0001          |
|            |                          | Control vs. 1                       | -15,75    | -30,19 to -1,315  | Yes          | *       | 0,0266           |
|            |                          | Control vs. 10                      | -5,232    | -19,67 to 9,205   | No           | ns      | 0,8541           |
|            |                          | Control vs. 100                     | 11,41     | -3,028 to 25,85   | No           | ns      | 0,1757           |
|            |                          | Control vs. 1000                    | 66,02     | 51,58 to 80,46    | Yes          | ****    | <0,0001          |
|            |                          | Control vs. 10000                   | 97,35     | 82,91 to 111,8    | Yes          | ****    | <0,0001          |
|            | Serum-free conditions    | Control vs. 0.1                     | -17,84    | -32,78 to -2,907  | Yes          | *       | 0,0123           |
|            |                          | Control vs. 1                       | -24,16    | -39,1 to -9,227   | Yes          | ***     | 0,0003           |
|            |                          | Control vs. 10                      | -22,28    | -37,21 to -7,339  | Yes          | ***     | 0,0010           |
|            |                          | Control vs. 100                     | -3,321    | -18,26 to 11,62   | No           | ns      | 0,9824           |
|            |                          | Control vs. 1000                    | 41,39     | 26,45 to 56,33    | Yes          | ****    | <0,0001          |
|            |                          | Control vs. 10000                   | 97,44     | 82,51 to 112,4    | Yes          | ****    | <0,0001          |
| <b>DNA</b> | Normal serum conditions  | Control vs. 0.1                     | -21,05    | -40,37 to -1,733  | Yes          | *       | 0,0269           |
|            |                          | Control vs. 1                       | -25,72    | -45,04 to -6,404  | Yes          | **      | 0,0041           |
|            |                          | Control vs. 10                      | -33,49    | -52,8 to -14,17   | Yes          | ****    | <0,0001          |
|            |                          | Control vs. 100                     | -40,29    | -60,65 to -19,94  | Yes          | ****    | <0,0001          |
|            |                          | Control vs. 1000                    | -60,32    | -88,32 to -32,31  | Yes          | ****    | <0,0001          |
|            |                          | Control vs. 10000                   | 45,9      | 26,58 to 65,22    | Yes          | ****    | <0,0001          |
|            | Reduced-serum conditions | Control vs. 0.1                     | -15,21    | -46,23 to 15,81   | No           | ns      | 0,6280           |
|            |                          | Control vs. 1                       | -21,15    | -52,17 to 9,869   | No           | ns      | 0,3006           |
|            |                          | Control vs. 10                      | -20,47    | -53,16 to 12,21   | No           | ns      | 0,3833           |
|            |                          | Control vs. 100                     | -64,23    | -95,25 to -33,21  | Yes          | ****    | <0,0001          |
|            |                          | Control vs. 1000                    | -136,6    | -169,3 to -103,9  | Yes          | ****    | <0,0001          |
|            |                          | Control vs. 10000                   | 1,35      | -29,67 to 32,37   | No           | ns      | 0,9999           |
|            | Serum-free conditions    | Control vs. 0.1                     | -20,59    | -43,45 to 2,281   | No           | ns      | 0,0940           |
|            |                          | Control vs. 1                       | -49,74    | -75,33 to -24,16  | Yes          | ****    | <0,0001          |
|            |                          | Control vs. 10                      | -39,59    | -67,04 to -12,14  | Yes          | **      | 0,0016           |
|            |                          | Control vs. 100                     | -20,42    | -43,28 to 2,449   | No           | ns      | 0,0982           |
|            |                          | Control vs. 1000                    | -25,82    | -55,68 to 4,039   | No           | ns      | 0,1159           |
|            |                          | Control vs. 10000                   | 70,15     | 47,28 to 93,02    | Yes          | ****    | <0,0001          |
| <b>LDH</b> | Normal serum conditions  | Control vs. 0.1                     | 8,957     | -1,532 to 19,45   | No           | ns      | 0,1237           |
|            |                          | Control vs. 1                       | 8,737     | -1,752 to 19,23   | No           | ns      | 0,1394           |
|            |                          | Control vs. 10                      | 7,318     | -3,171 to 17,81   | No           | ns      | 0,2798           |
|            |                          | Control vs. 100                     | 8,223     | -2,266 to 18,71   | No           | ns      | 0,1819           |
|            |                          | Control vs. 1000                    | 0,1011    | -10,39 to 10,59   | No           | ns      | >0,9999          |
|            |                          | Control vs. 10000                   | -38,14    | -48,63 to -27,65  | Yes          | ****    | <0,0001          |
|            | Reduced-serum conditions | Control vs. 0.1                     | 44,97     | 37,21 to 52,72    | Yes          | ****    | <0,0001          |
|            |                          | Control vs. 1                       | 43,43     | 35,68 to 51,19    | Yes          | ****    | <0,0001          |
|            |                          | Control vs. 10                      | 43,14     | 35,38 to 50,89    | Yes          | ****    | <0,0001          |
|            |                          | Control vs. 100                     | 40,9      | 33,15 to 48,66    | Yes          | ****    | <0,0001          |
|            |                          | Control vs. 1000                    | 26,66     | 18,91 to 34,41    | Yes          | ****    | <0,0001          |
|            |                          | Control vs. 10000                   | -27,04    | -34,79 to -19,28  | Yes          | ****    | <0,0001          |
|            | Serum-free conditions    | Control vs. 0.1                     | 75,63     | 69,09 to 82,17    | Yes          | ****    | <0,0001          |
|            |                          | Control vs. 1                       | 75,42     | 68,88 to 81,96    | Yes          | ****    | <0,0001          |
|            |                          | Control vs. 10                      | 76,88     | 70,34 to 83,42    | Yes          | ****    | <0,0001          |
|            |                          | Control vs. 100                     | 76,6      | 70,05 to 83,14    | Yes          | ****    | <0,0001          |
|            |                          | Control vs. 1000                    | 67,26     | 60,72 to 73,8     | Yes          | ****    | <0,0001          |
|            |                          | Control vs. 10000                   | -10,25    | -16,79 to -3,711  | Yes          | ***     | 0,0005           |
